# Supplementary material for: MKL1 Regulates Hepatocellular Carcinoma Cell Proliferation, Migration and Apoptosis via the COMPASS Complex and NF-Κb Signaling
Source: Research Square preprint supplement (doi:10.21203/rs.3.rs-390556/v1), 2021-04-05
Supplement: Supplementary file 1 [file 2a58e98b81a8c287e999f2ab.docx]

**Supplementary Figure 1：original bands of WB**

Figure A：


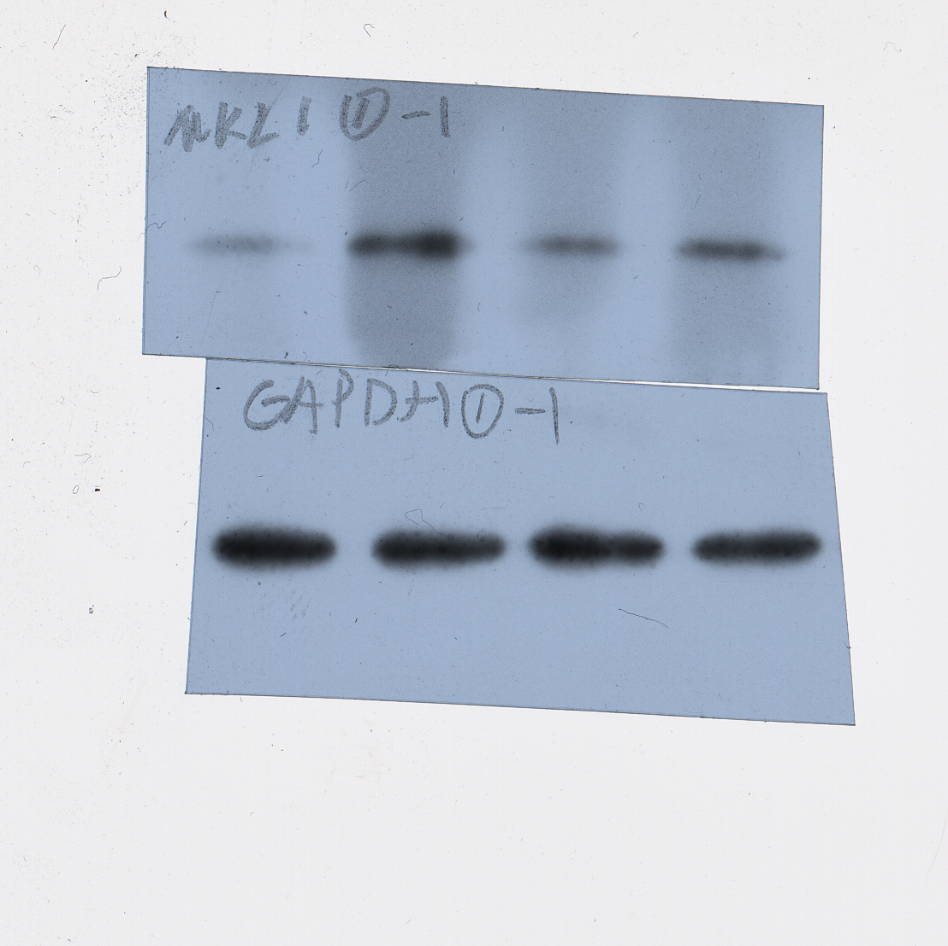


Figure B：
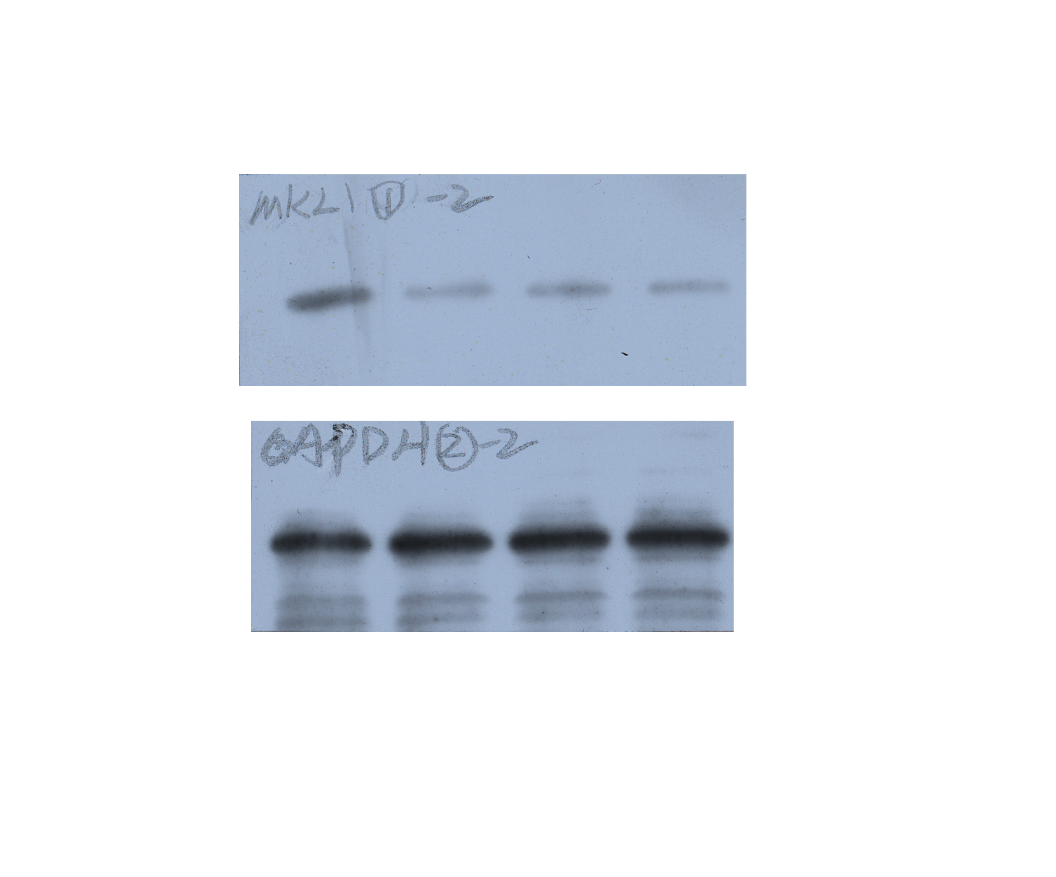


Figure C：


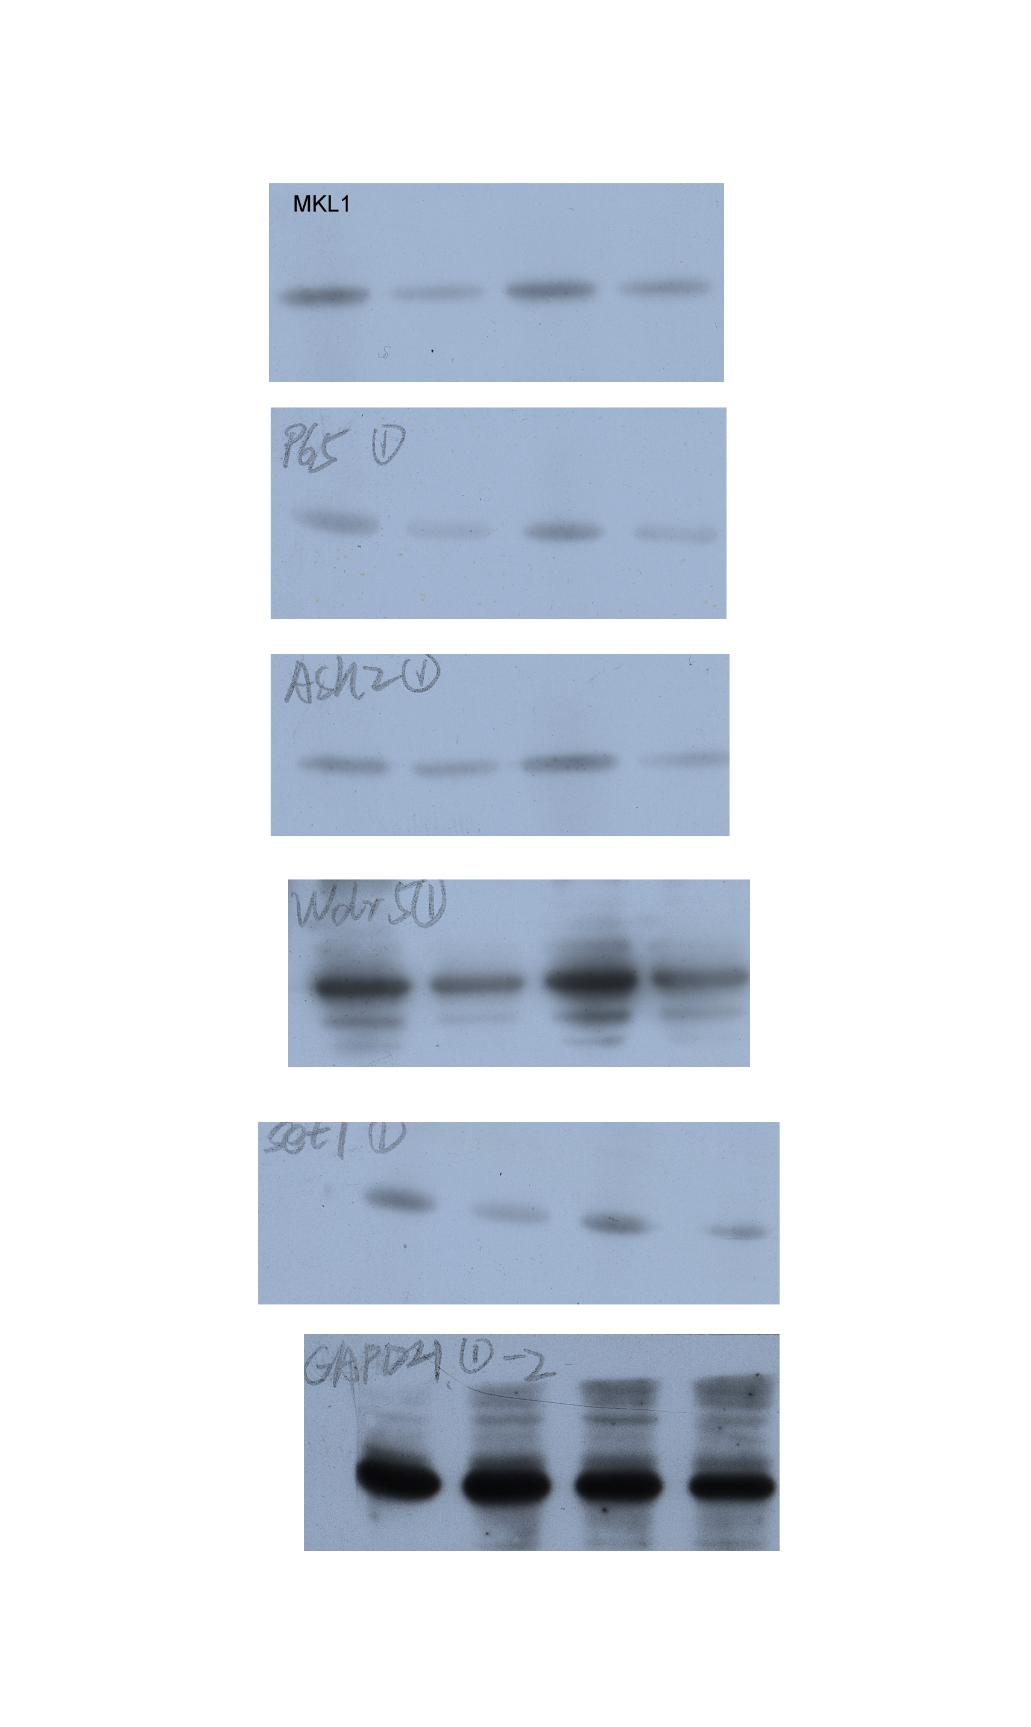


**Supplementary Figure 2 ：**


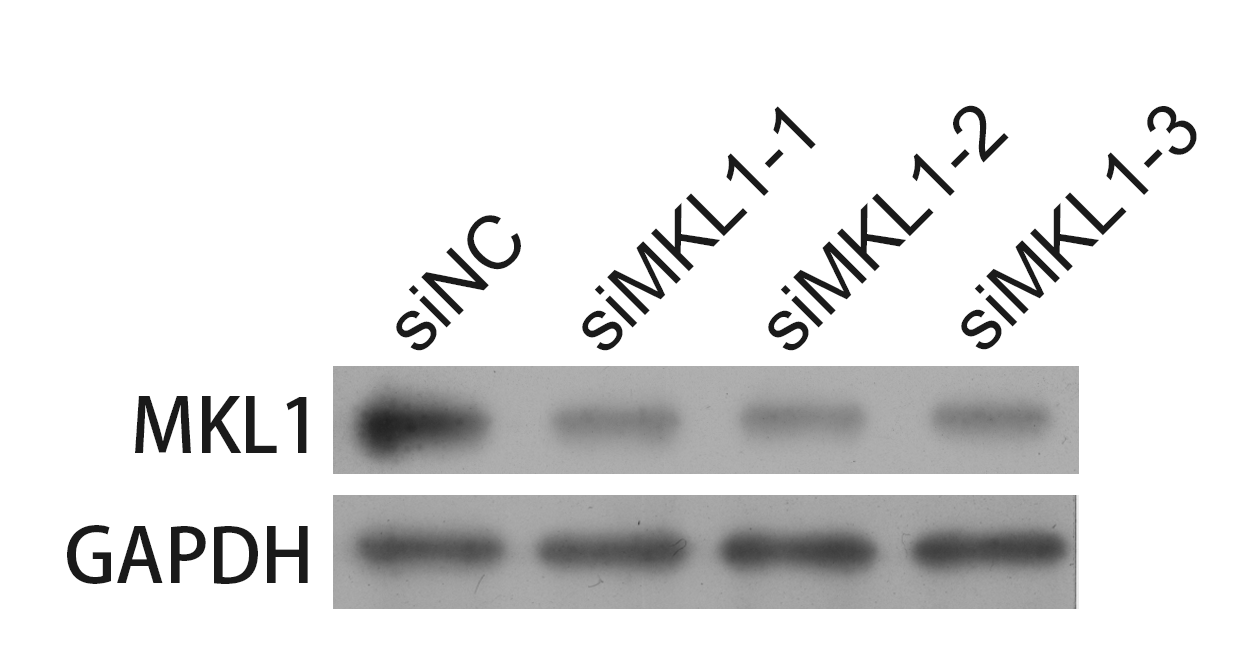


**Supplementary Figure 2**

The knockdown of MKL1 gene expression in Huh-7 cells by transfection with siMKL1 sequences. MKL1 protein levels were detected by western blotting with GAPDH as the internal standard.

**Supplementary Figure 3：**


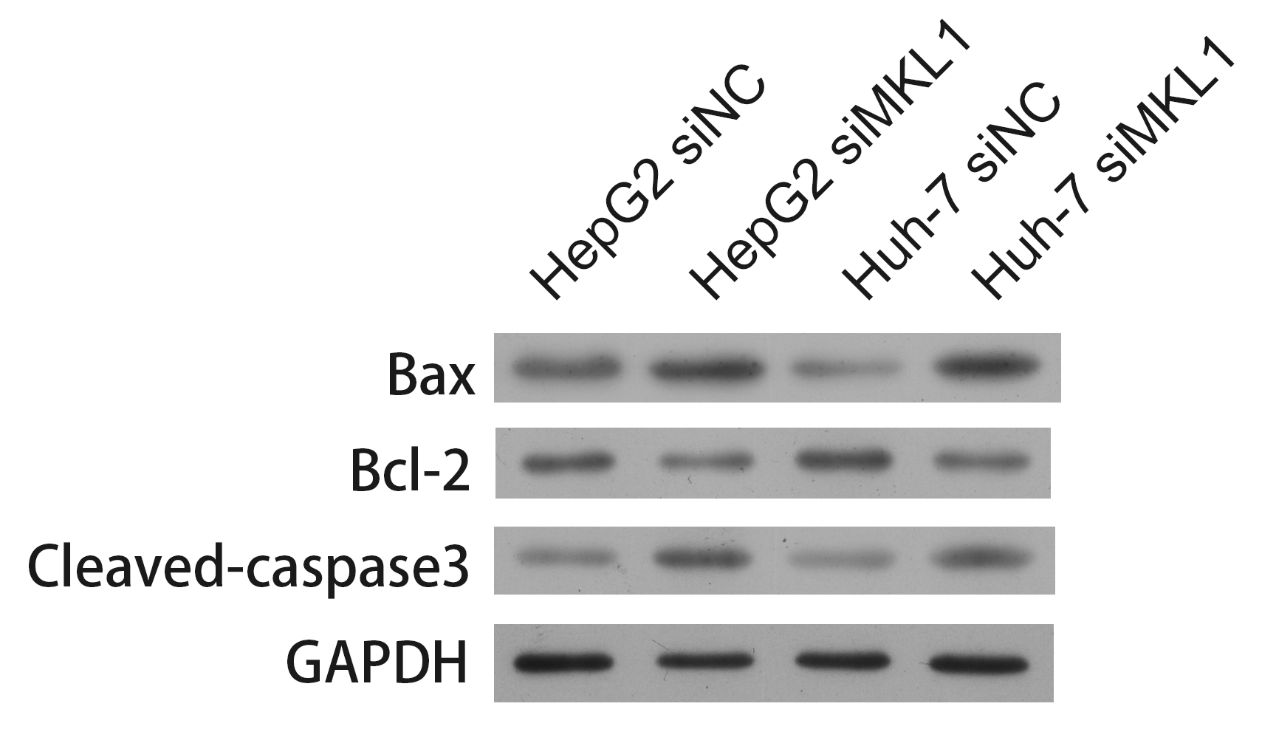


**Supplementary Figure 3**

Suppression of HepG2 and Huh-7 the protein expression of Bax, Bcl-2 and cleased-caspase3 induced by MKL1 gene silencing. Bax, Bcl-2 and cleased-caspase3 protein levels in HCC cells were detected by western blotting, with GAPDH as the internal standard.

**Supplementary Figure 4：**


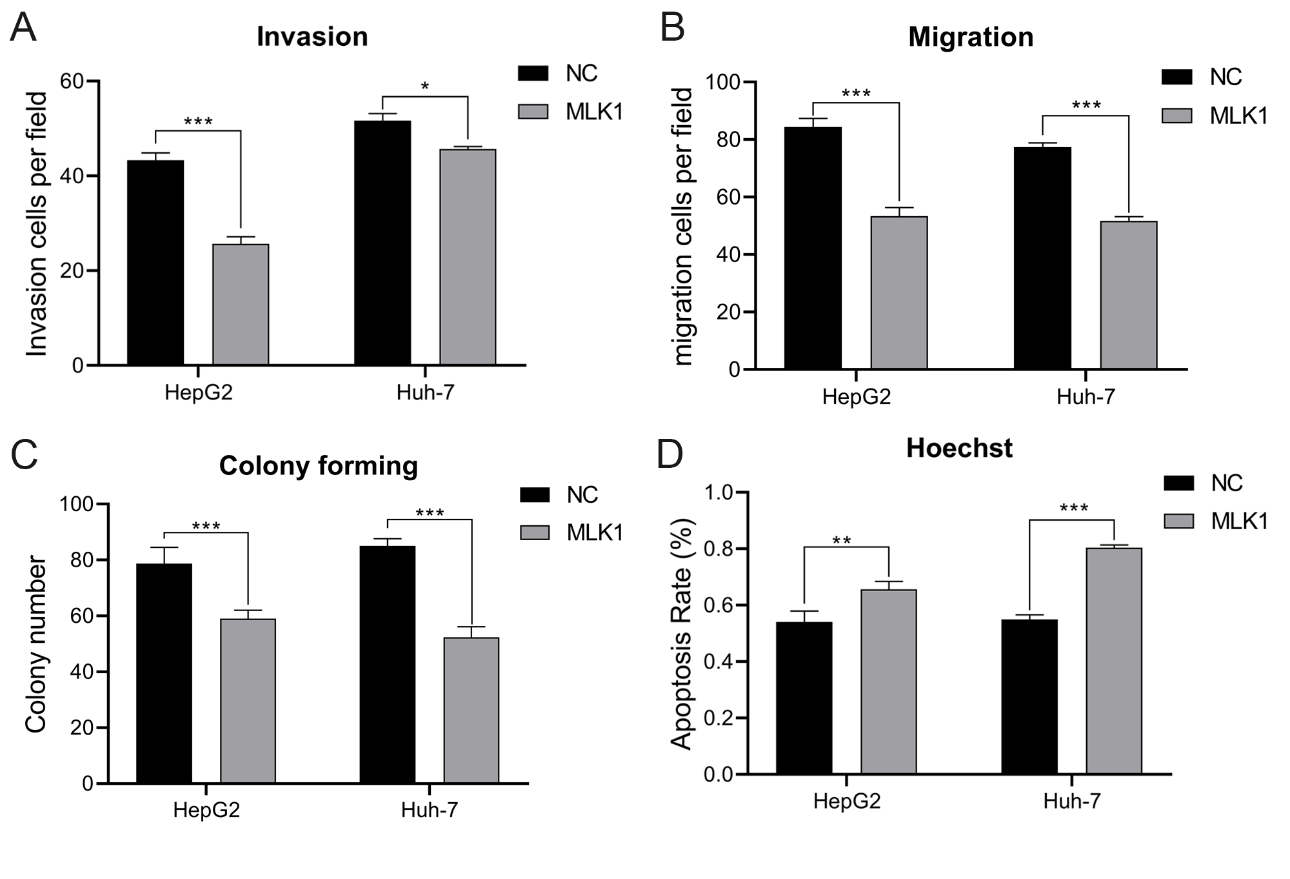


**Supplementary Figure 4**

Suppression of HepG2 and Huh-7 cell migration, invasion, colony formation capacities and apoptosis induced by MKL1 gene silencing. *P<0.05; **P<0.01.

**Supplementary Figure 5：**


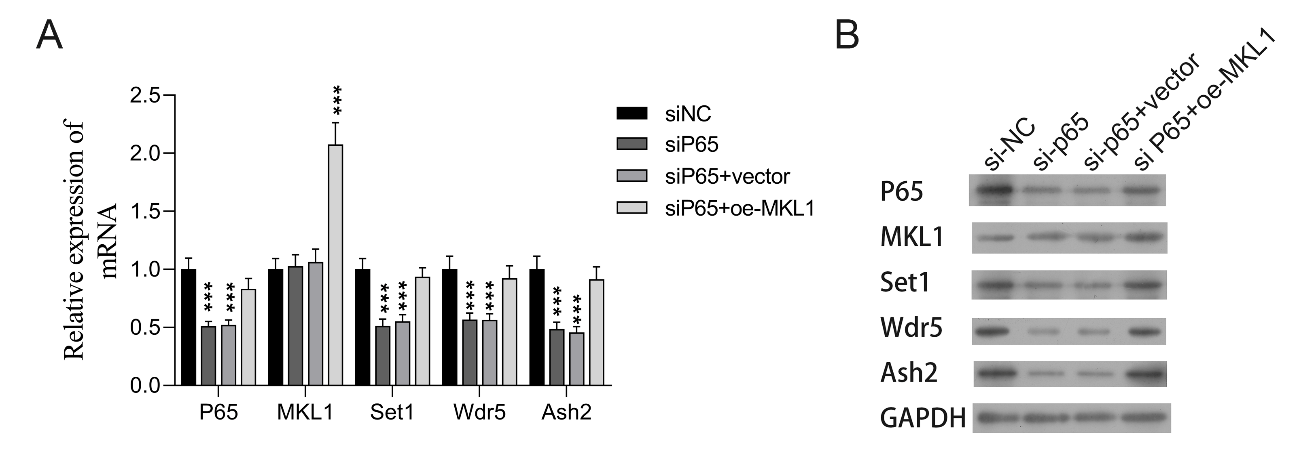


**Supplementary Figure 5**

(A) The mRNA expression of COMPASS complex protein and MKL1 protein were detected by transfection of siP65. (B) The protein expression of COMPASS complex protein and MKL1 protein were detected by transfection of siP65. MKL1, WRR5, Ash2, SET1 and p65 protein levels in HCC cells were detected by western blotting, with GAPDH as the internal standard. *P<0.05; **P<0.01.
